# Supplementary material for: De novo transcriptome assembly for four species of crustose coralline algae and analysis of unique orthologous genes
Source: PubMed Central journal article supplement (PMC6717203; doi:10.1038/s41598-019-48283-1), 2019-08-30
Supplement: 41598_2019_48283_MOESM1_ESM.pdf [file 41598_2019_48283_MOESM1_ESM.pdf]

*De novo* transcriptome assembly for four species of crustose coralline algae and analysis of unique orthologous genes.

Tessa M. Page<sup>1,2</sup>, Carmel McDougall<sup>1,2</sup>, Guillermo Diaz-Pulido<sup>1,2\*</sup>

<sup>1</sup>School of Environment and Science, Griffith University, Brisbane, Queensland, Australia

<sup>2</sup>Australian Rivers Institute, Griffith University, Brisbane, Queensland, Australia

Supplementary Information

Supplementary Methods

### **Experimental setup.**

In order to obtain a full profile of genes expressed during natural conditions and altered environmental conditions, we subjected the CCA fragments to a 2.5-week multi factorial experiment, manipulating temperature and CO<sub>2</sub>. An outdoor 2-header sump (275 L each) system with twelve 10 L individual treatment tanks was set-up in the outdoor laboratory space at LIRS. *p*CO<sub>2</sub> was regulated in the two header sumps at ambient (pH 8.10; ~ 400 μatm) and high (pH 7.70; ~1200 μatm) levels and each individual treatment tank at either ambient (27°C) or high (+ 1.5°C) temperature. The high *p*CO<sub>2</sub> and temperature levels represent RCP6.0 scenario for predicted end of century levels<sup>1</sup>. Three individual tanks were allocated for each temperature and *p*CO<sub>2</sub> combination. Temperature levels were regulated within each treatment tank using 50W Eheim aquarium heaters (EHEIM, Deizisau, Germany). Seawater pH/*p*CO<sub>2</sub> was controlled by injection of pure CO<sub>2</sub> gas controlled by a pH sensor (Aquarium Controller Evolution, Aquatronica, Reggio Emilia, Italy) within each header sump. Water from the sumps was then distributed (12 L hr<sup>-1</sup>) to one of twelve treatment tanks matching respective temperature treatment. Each 10 L treatment tank contained one individual from each of the four species used during this study. Temperature and *p*CO<sub>2</sub> were gradually increased over 48 hours until target temperature (+ 1.5°C) and pH (7.75) were reached. Following that, individuals were held at constant experimental treatment conditions for two weeks. Algae fragments were gently brushed every 4 – 5 days to rid them of epiphytes. Mortality or changes in health were monitored throughout the 2.5 – weeks.

## Seawater measurements.

Salinity and temperature were measured daily by use of a conductivity meter (SevenGo, Mettler Toledo). pH was measured every 30 s within the sumps using a temperature compensated, pH electrode (inPro4501VP, Mettler Toledo) that was calibrated to NBS buffers. pH was monitored within the treatment tanks using an NBS calibrated portable pH meter and electrode (Plug & Play glass pH electrode, Mettler Toledo). Irradiance was measured every other day, with average light level values in shaded regions of the tanks at  $\sim 30 \mu\text{mol photons m}^{-2} \text{ s}^{-1}$  and for the non-shaded areas of the tanks at  $\sim 200 \mu\text{mol photons m}^{-2} \text{ s}^{-1}$ . Alkalinity samples were taken twice during the experiment, by collecting water samples every 6 hours for 24 hours. Samples were collected from every treatment tank and sump and preserved by adding 20  $\mu\text{l}$  of  $\text{HgCl}_2$ . Total alkalinity was measured by potentiometric titrations<sup>2</sup>. Samples were run in triplicate or further until a maximum of 1% error was reached between each replicate. Seawater carbonate chemistry (Table S1) was determined using  $\text{CO}_2\text{SYS v. 2.1}^3$  with the dissociation constants of Mehrbach et al. 1973<sup>4</sup> refit by Dickson & Millero (1987)<sup>5</sup>.

Supplementary Table 1. Values (means  $\pm$  SE) for carbonate chemistry parameters for each treatment over the course of the 2.5-week experiment. Treatments ACOAT, ACOHT, HCOAT, and HCOHT equate to ambient  $\text{CO}_2$  and ambient  $^{\circ}\text{C}$ , ambient  $\text{CO}_2$  and  $+1.5^{\circ}\text{C}$ , elevated  $\text{CO}_2$  and ambient  $^{\circ}\text{C}$ , and elevated  $\text{CO}_2$  and  $+1.5^{\circ}\text{C}$ , respectively. pH is on NBS scale,  $\Omega_{\text{Ca}}$  is equal to the saturation state of calcite, and  $\Omega_{\text{Ar}}$  is equal to the saturation state of aragonite. N = 16.

| Treatment                          | ACOAT               | ACOHT               | HCOAT                | HCOHT                |
|------------------------------------|---------------------|---------------------|----------------------|----------------------|
| Temp ( $^{\circ}\text{C}$ )        | $27.13 \pm 0.050$   | $28.66 \pm 0.110$   | $26.95 \pm 0.110$    | $28.57 \pm 0.100$    |
| Salinity (psu)                     | $34.88 \pm 0.050$   | $35.09 \pm 0.040$   | $34.94 \pm 0.040$    | $35.12 \pm 0.030$    |
| pH                                 | $8.19 \pm 0.004$    | $8.18 \pm 0.004$    | $7.76 \pm 0.003$     | $7.76 \pm 0.005$     |
| TA ( $\mu\text{mol kg}^{-1}$ )     | $2369.55 \pm 8.670$ | $2357.52 \pm 7.170$ | $2363.57 \pm 6.900$  | $2367.65 \pm 7.460$  |
| $p\text{CO}_2$ ( $\mu\text{atm}$ ) | $406.26 \pm 4.401$  | $410.71 \pm 4.700$  | $1281.17 \pm 11.080$ | $1283.09 \pm 15.350$ |
| $\Omega_{\text{Ca}}$               | $5.66 \pm 0.050$    | $5.81 \pm 0.060$    | $2.46 \pm 0.020$     | $2.62 \pm 0.030$     |
| $\Omega_{\text{Ar}}$               | $3.75 \pm 0.030$    | $3.87 \pm 0.040$    | $2.63 \pm 0.010$     | $1.75 \pm 0.020$     |

## References

- 1 IPCC. Climate Change 2013: The Physical Science Basis. Contribution of Working Group I to the Fifth Assessment Report of the Intergovernmental Panel on Climate Change. 1535 (Cambridge, United Kingdom and New York, NY, USA, 2013).
- 2 Allan, B. J., Miller, G. M., McCormick, M. I., Domenici, P. & Munday, P. L. Parental effects improve escape performance of juvenile reef fish in a high-CO<sub>2</sub> world. *Proc Biol Sci* **281**, 20132179, doi:10.1098/rspb.2013.2179 (2014).
- 3 MS Excel Program Developed for CO<sub>2</sub> System Calculations (Oak Ridge, Tennessee, 2006).
- 4 Mehrbach, C., Culberson, C., Hawley, J. & Pytkowicz, R. Measurement of the apparent dissociation constants of carbonic acid in seawater at atmospheric pressure<sup>1</sup>. *Limnology and Oceanography* **18**, 897-907 (1973).
- 5 Dickson, A. G. & Millero, F. J. A comparison of the equilibrium constants for the dissociation of carbonic acid in seawater media. *Deep Sea Research Part A. Oceanographic Research Papers* **34**, 1733-1743, doi:[https://doi.org/10.1016/0198-0149\(87\)90021-5](https://doi.org/10.1016/0198-0149(87)90021-5) (1987).
